# Supplementary material for: Psychosocial Treatment of Bipolar Disorder: Clinician Knowledge, Common Approaches, and Barriers to Effective Treatment
Source: Atypon-hosted journal article supplement (doi:10.1176/appi.ps.201400004), 2015-09-01
Supplement: appi.ps.201400004.ds001.pdf [file appi.ps.201400004.ds001.pdf]

## Frontline Clinician Bipolar Treatment

## Appendices

## Online Appendix A: Clinician and Practice Characteristics

|                                                            | n<br>(or mean) | % (or standard<br>deviation) |
|------------------------------------------------------------|----------------|------------------------------|
| Professional Discipline                                    |                |                              |
| Social Worker                                              | 31             | 56%                          |
| Non-Social Work Therapists                                 | 24             | 44%                          |
| Year Completed Training                                    |                |                              |
| 1978-1990                                                  | 10             | 18%                          |
| 1991-2000                                                  | 12             | 22%                          |
| 2001-2004                                                  | 12             | 22%                          |
| 2005-2008                                                  | 6              | 11%                          |
| 2009-2011                                                  | 15             | 27%                          |
| Therapeutic Approach (maximum rating of 4)                 |                |                              |
| CBT techniques                                             | 3.2            | 0.50                         |
| IPSRT techniques                                           | 2.9            | 0.40                         |
| Non- specific techniques                                   | 2.8            | 0.44                         |
| Other therapy techniques**                                 | 2.2            | 0.44                         |
| Average number of visits with adults 18+ per week          | 18             | 9                            |
| Percent of visits involving patients with bipolar disorder |                |                              |
| 0-10%                                                      | 13             | 24%                          |
| 11-25%                                                     | 13             | 24%                          |
| 25-50%                                                     | 23             | 42%                          |
| 51% or more                                                | 10             | 18%                          |

\* Respondents may choose more than one theory, so responses do not add up to 100%

\*\* Responses include arts therapy, choice/reality therapy, Gestalt, Motivational Interviewing, , Criminal Personality Theory

Frontline Clinician Bipolar Treatment

Online Appendix B: Knowledge of Bipolar Disorder Treatment

|                                                                                                                                                                                        | n (or mean)                 | % (or std) |
|----------------------------------------------------------------------------------------------------------------------------------------------------------------------------------------|-----------------------------|------------|
| To what extent do you agree or disagree with the following statement: I am very knowledgeable in the treatment of individuals with bipolar disorder                                    |                             |            |
| Strongly Agree                                                                                                                                                                         | 8                           | 15%        |
| Agree                                                                                                                                                                                  | 28                          | 52%        |
| Neither Agree nor Disagree                                                                                                                                                             | 13                          | 24%        |
| Disagree                                                                                                                                                                               | 5                           | 9%         |
| Strongly Disagree                                                                                                                                                                      | 0                           | 0%         |
| Bipolar Disorder Knowledge                                                                                                                                                             | Question Answered Correctly |            |
|                                                                                                                                                                                        | n                           | %          |
| Management of sleep habits is a very important part of treating bipolar disorder.                                                                                                      | 53                          | 96%        |
| Psychotherapy improves outcomes for patients with bipolar disorder when administered with medications.                                                                                 | 52                          | 95%        |
| The maintenance phase of treatment for bipolar disorder focuses on preventing recurrence.                                                                                              | 49                          | 89%        |
| The combination of medication and bipolar-specific psychotherapy decreases the likelihood that patients will suffer a new episode of depression or mania relative to medication alone. | 45                          | 82%        |
| Atypical antipsychotic medications (such as Zyprexa or Abilify) are used as mood stabilizing medications in bipolar disorder.                                                          | 40                          | 73%        |
| Mood stabilizers such as lithium, Depakote, and Tegretol are the mainstay of treatment for bipolar disorder.                                                                           | 37                          | 67%        |
| Most patients with bipolar disorder spend more time in the depressive phase of the illness than the manic phase of the illness.                                                        | 36                          | 65%        |
| Antidepressant medications may provoke mood cycling in patients with bipolar disorder.                                                                                                 | 35                          | 64%        |
| Evidence suggests that many mental health clinicians misdiagnose patients with bipolar disorder as suffering from unipolar depression.                                                 | 32                          | 58%        |
| Cyclothymic disorder is mild mood swings.                                                                                                                                              | 31                          | 56%        |
| Side effects occur only in a small percentage of patients taking mood stabilizers (false)                                                                                              | 33                          | 60%        |
| The depressive phase of bipolar disorder takes longer to treat than the manic phase.                                                                                                   | 30                          | 55%        |
| Antidepressant medications should only be prescribed for a patient with bipolar disorder if they are receiving concurrent treatment with a mood stabilizer.                            | 26                          | 47%        |
| Level of perceived skill with bipolar patients (mean score, higher score = higher level of skill – maximum                                                                             |                             |            |

## Frontline Clinician Bipolar Treatment

|                                                                             |     |     |  |
|-----------------------------------------------------------------------------|-----|-----|--|
| score of 4)                                                                 |     |     |  |
| Counseling                                                                  | 3.5 | 0.6 |  |
| Psychoeducation for the patient                                             | 3.3 | .7  |  |
| Diagnosis                                                                   | 3.2 | .7  |  |
| Exploration of feelings about medication and identification of side effects | 3.0 | .8  |  |
| Identifying early warning signs of possible recurrence                      | 3.3 | .7  |  |
| Psychoeducation for patients' family members                                | 3.0 | .9  |  |

## Frontline Clinician Bipolar Treatment

### Online Appendix C: Perceived Barriers to Optimal Treatment of Bipolar Disorder

|                                                                                                              | Limits a Great Deal |     |
|--------------------------------------------------------------------------------------------------------------|---------------------|-----|
|                                                                                                              | n                   | %   |
| How much does each factor limit your ability to provide "optimal" mental health treatment for your patients? |                     |     |
| Patients poor adherence to treatment                                                                         | 31                  | 56% |
| Alcohol/substance use problems interfere with treatment                                                      | 27                  | 49% |
| Alcohol/substance use problems were more pressing                                                            | 24                  | 44% |
| Patient has limited insight into illness                                                                     | 17                  | 31% |
| Patient too unstable to manage as outpatient                                                                 | 17                  | 31% |
| Patient refuses medications                                                                                  | 16                  | 29% |
| Patient refuses to give up highs                                                                             | 12                  | 22% |
| Patient/family reluctance to accept diagnosis or treatment                                                   | 13                  | 24% |
| Medication side effects are intolerable to patient                                                           | 11                  | 20% |
| Poor reimbursement or limited benefits                                                                       | 8                   | 15% |
| Preferred medication difficult to obtain                                                                     | 7                   | 13% |
| Limited visit time for counseling/education                                                                  | 5                   | 9%  |
| Inadequate time to provide follow-up                                                                         | 4                   | 7%  |
| Insufficient psychiatric back-up                                                                             | 4                   | 7%  |
| Inadequate provisions for after-hours emergency contact                                                      | 4                   | 7%  |

## Frontline Clinician Bipolar Treatment
